## 7 **Summary**

8 Stimulus and location specificity are long considered hallmarks of visual perceptual learning. This  
9 renders visual perceptual learning distinct from other forms of learning, where generalization can be  
10 more easily attained, and unsuitable for practical applications, where generalization is key. Based on  
11 hypotheses derived from the structure of the visual system, we test here whether stimulus variability  
12 can unlock generalization in perceptual learning. We train subjects in orientation discrimination, while  
13 we vary the amount of variability in a task-irrelevant feature, spatial frequency. We find that  
14 independently of task difficulty, this manipulation enables generalization of learning to new stimuli  
15 and locations, while not negatively affecting the overall amount of learning on the task. We then use  
16 deep neural networks to investigate how variability unlocks generalization. We find that networks  
17 develop invariance to the task-irrelevant feature when trained with variable inputs. The degree of  
18 learned invariance strongly predicts generalization. A reliance on invariant representations can explain  
19 variability-induced generalization in visual perceptual learning, suggests new targets for  
20 understanding the neural basis of perceptual learning in high-order visual cortex, and presents an easy  
21 to implement modification of common training paradigms that may benefit practical applications.

22

23

24 **Keywords:** visual perceptual learning, orientation discrimination, generalization, deep neural  
25 networks

## 26 Introduction

27 A fundamental problem for perception is to extract reliable information from a highly variable signal<sup>1</sup>.  
28 It is widely accepted that the visual system achieves this by learning what is consistent in its inputs, a  
29 process called *perceptual learning* (PL). However, how the enormous variability in the environment<sup>2</sup>  
30 impacts PL *itself* is not well understood. Here, we ask how the visual system solves the challenge of  
31 variability for learning.

32 Variability poses both a problem and an opportunity for PL. Varying stimuli are problematic because  
33 they entail reduced predictability<sup>3</sup>, weaker memory traces<sup>4</sup>, uncertain reward assignment<sup>5</sup>, and non-  
34 linear decision rules<sup>6</sup>. They can thus slow down or impair learning. Consequently, state-of-the-art  
35 research and commonly employed PL protocols aim to maximize PL using highly unnatural conditions  
36 where variability is minimized, e.g., when learning one stimulus alternative at a time. However, what  
37 is often overlooked is that variability can be a great asset for learning as it facilitates *generalization*  
38 (i.e., applying learned behavior to new stimuli): variability may foster the extraction of core features  
39 across stimuli through abstraction, concept learning, and rule derivation. In many learning domains,  
40 variability acts as a catalyst for generalization<sup>7</sup>. In fact, theoretical studies suggest that the degree of  
41 variability during learning determines whether the system specializes on specific stimuli by  
42 memorizing them or instead learns generalizable rules<sup>8</sup>. Although generalization is frequently  
43 considered the ultimate goal of learning<sup>9</sup>, the current mainstream view on PL disregards variability  
44 and generalization. Instead, PL is often said not to generalize<sup>10,11</sup>. This renders visual PL an outlier  
45 amongst many learning phenomena.

46

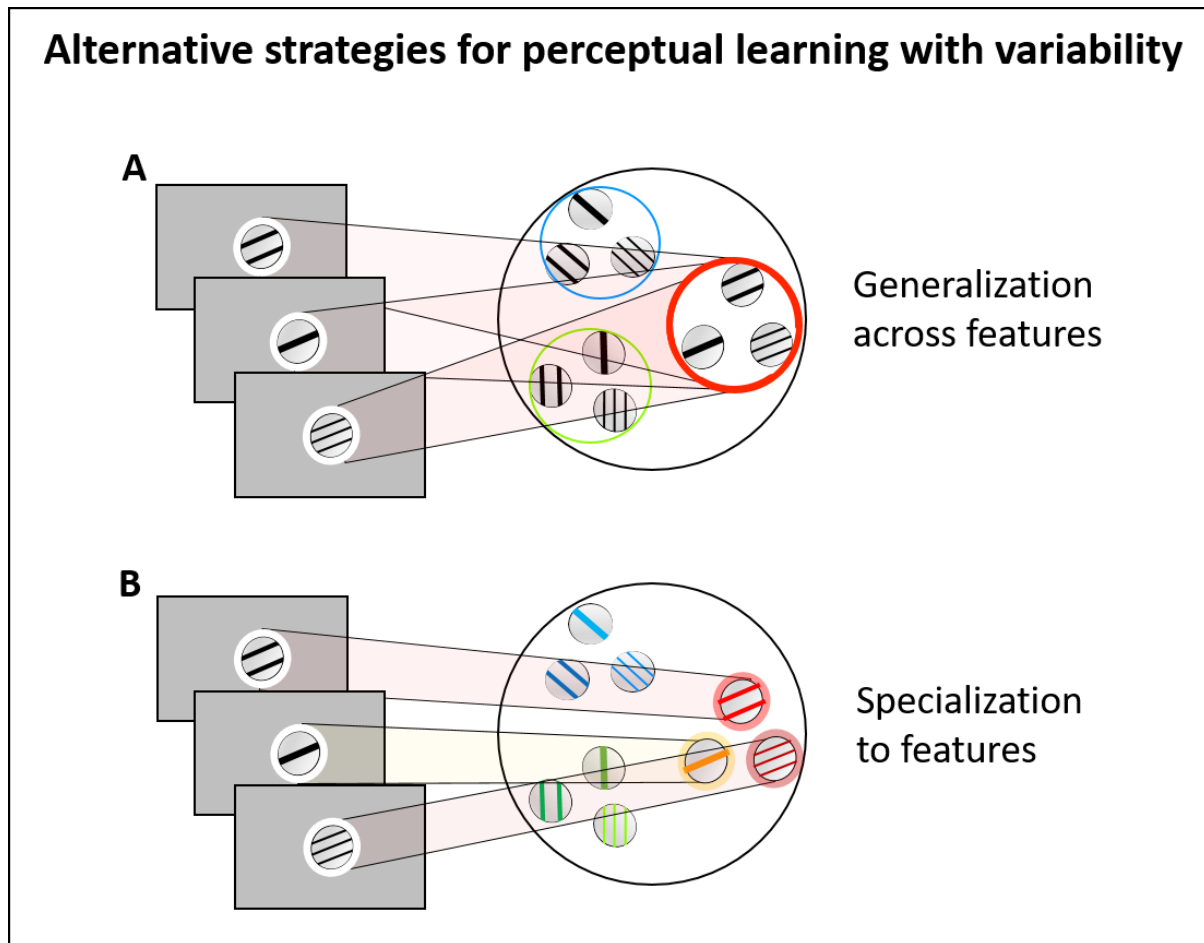

47

48 **Figure 1: Alternative strategies for visual perceptual learning with variability.** A. Generalization  
49 strategy: if input varies from trial to trial, learning could rely on neurons invariant to task-irrelevant  
50 features of the stimuli. These neurons deal with variability by subsuming it in their broad tuning and  
51 can accommodate generalization to new stimuli. However, their tuning to the task-relevant feature  
52 may not be very precise. B. Specialization strategy: alternatively, the system could implement learning  
53 with neurons narrowly tuned to task-relevant and task-irrelevant features. These neurons can provide  
54 high precision information for the task at hand. However, more neurons need to undergo plasticity  
55 than in A if inputs vary. Moreover, a specialization strategy does not lead to generalization, as new,  
56 untrained neurons are needed to accommodate new inputs.

57

58 Yet, the structure of the visual system suggests (at least) two ways to solve the challenge of variability  
59 during PL: the system could *generalize* by relying on invariant representations or *specialize* on both  
60 task-relevant and -irrelevant aspects of the stimuli, using highly precise neurons narrowly tuned to  
61 both dimensions. If the visual system employs any of these strategies is currently unknown.

62 A generalization strategy based on invariant representations, e.g., in ventral temporal cortex (VTC),  
63 deals with variability by subsuming it: invariant representations provide information about visual

64 stimuli in an abstract form, irrespective of task-irrelevant variability in low-level details of the input  
65 (Fig. 1A). Thus, even if stimuli differ in appearance from trial to trial, invariant neurons still  
66 systematically provide relevant information, and can serve as a substrate for PL despite variability.  
67 However, these neurons are often not very precise: e.g., they signal which orientation is presented,  
68 but cannot distinguish orientations as accurately as neurons in early visual areas<sup>12</sup>.

69 Alternatively, the visual system could specialize on both task-relevant and -irrelevant aspects of the  
70 stimuli, using highly precise neurons narrowly tuned to both dimensions (Fig. 1B). This strategy is  
71 optimal when there is little variability because PL can be concentrated on the most informative  
72 neurons. When facing high variability, this strategy implies that separate neurons need to be recruited  
73 for each stimulus alternative during training. E.g., if oriented stimuli vary in spatial frequency (SF)  
74 during orientation discrimination PL, each orientation-SF band combination needs to be learned  
75 separately. This strategy readily assures that task performance relies on the most precise orientation  
76 information available. Yet, by relying on narrowly tuned neurons, this strategy comes at a cost,  
77 because these neurons cannot, by themselves, support generalization to other stimuli or locations in  
78 the visual field.

79 Here, we test how the visual system deals with the challenge of variability while achieving high  
80 performance in PL. We chose two features which are known to entail highly specific PL effects,  
81 orientation and SF<sup>13</sup>. During training, we systematically vary the required precision of the orientation  
82 discrimination task; in addition, subjects are trained with different degrees of variability in a task-  
83 irrelevant dimension, SF. We find that task-irrelevant SF variability indeed leads to better  
84 generalization of orientation discrimination performance to new SFs that were never shown during  
85 training, even in difficult tasks. Furthermore, subjects trained with variable stimuli can generalize  
86 better to new, untrained locations. Together, this suggests that they rely on SF-invariant neurons with  
87 large receptive fields. We then perform the same experiments in a deep neural network (DNN) that  
88 recapitulates several known PL phenomena<sup>14</sup>. We find a similar pattern of results, suggesting that  
89 variability-induced catalysis of generalization holds in vivo as much as in silico. We go on to show that  
90 SF variability during training leads to the recruitment (or emergence) of SF-invariant representations  
91 – and not to an increase of SF-specialized units – highlighting the benefits of invariant representations  
92 for generalization.

93

## 94 **Results**

95 We trained four groups of subjects ( $n=28$ ) in an orientation discrimination task for several days, in  
96 which they had to determine whether a grating was tilted clockwise or counterclockwise from a

97 reference on every trial. Two groups learned a high precision version of the task, with orientation  
98 differences between 0.5 and 2.75 deg, while two other groups learned a low precision version of the  
99 task, with orientation differences between 3 and 5.25 deg. One group from each precision level was  
100 trained with a single SF (1.70 cpd), referred to as ‘low variability’ from here on, while the other group  
101 received training with three pseudo-randomly interleaved SFs (0.53, 1.70 and 2.76 cpd), referred to  
102 as ‘high variability’.

103 All four groups showed statistically significant increases in orientation discrimination performance as  
104 a function of training: on average, orientation thresholds decreased by  $1.36^\circ$  in the four training  
105 groups (Supplemental Fig. S1). Expressed in units of “Learning Index” (LI)<sup>15</sup>, which quantifies learning  
106 relative to the baseline performance level, the average improvement was  $LI=0.13$  (Fig. 2A). In fact,  
107 there were no significant differences in LIs between the groups (precision main effect  $F(1, 24)=0.32$ ,  
108  $p=0.574$ , partial  $\eta^2=0.01$ ; variability main effect  $F(1, 24)=0.03$ ,  $p=0.863$ , partial  $\eta^2=0.02$ ; interaction  
109 effect  $F(1, 24)=0.05$ ,  $p=0.830$ , partial  $\eta^2=0$ ). This suggests that variability did not negatively affect the  
110 amount of PL of the trained task.

111

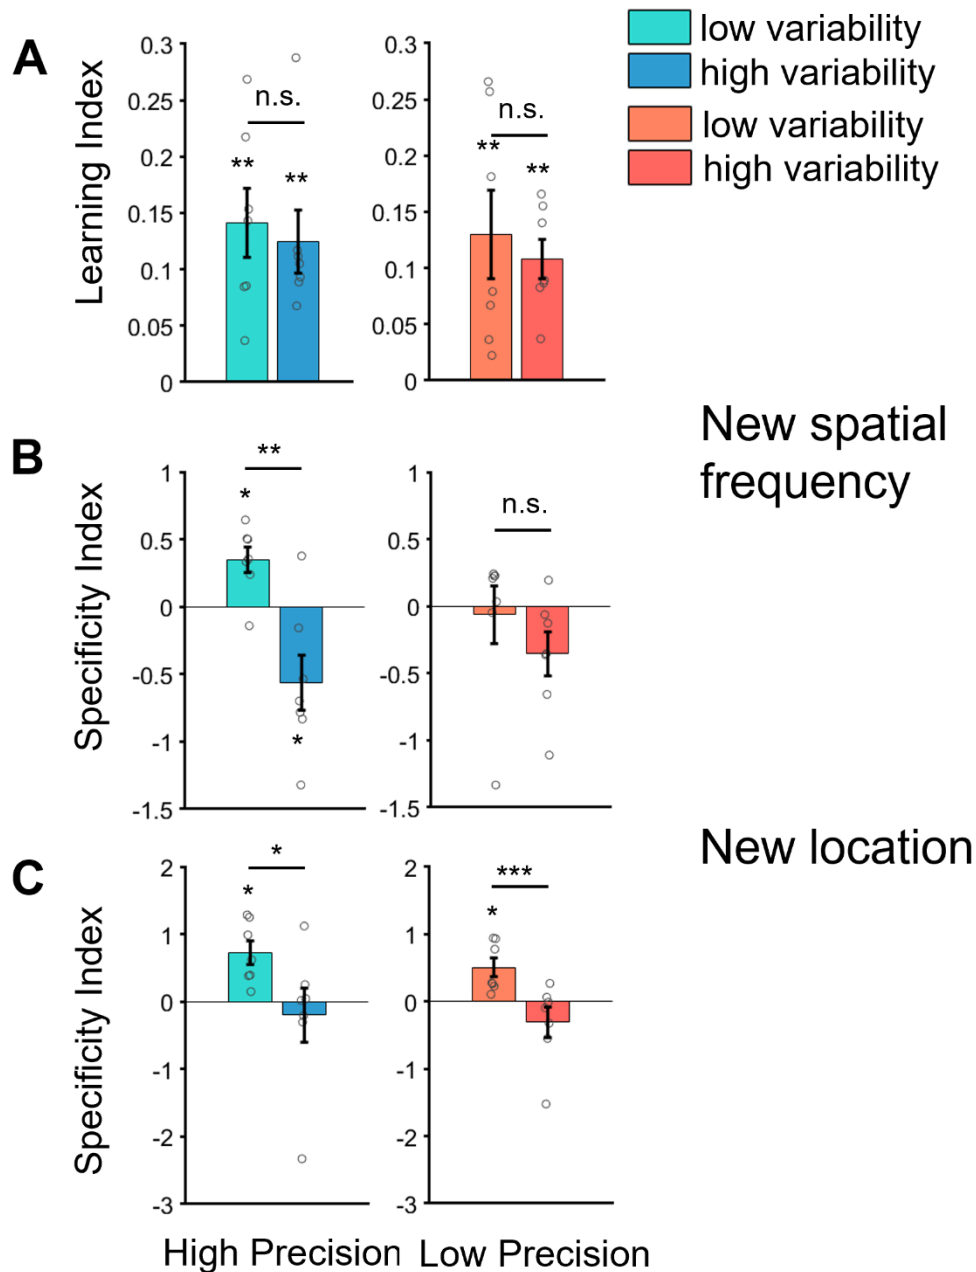

112

113 **Figure 2: Learning and generalization in human subjects.** **A.** Learning in orientation discrimination,  
 114 quantified as Learning Index (LI), was significant in all groups (high precision groups; low variability  
 115 mean LI=0.14, permutation test,  $p=0.008$ , Hedges'  $g=2.31$ ; high variability mean LI=0.12, permutation  
 116 test,  $p=0.008$ , Hedges'  $g=2.23$ ; low precision groups; low variability mean LI=0.13, permutation test,  
 117  $p=0.008$ , Hedges'  $g=1.66$ ; high variability mean LI=0.11, permutation test,  $p=0.008$ , Hedges'  $g=3.06$ ).  
 118 Task-irrelevant variability did not negatively affect the amount of learning (high precision groups mean  
 119 difference in LI=0.017, exact permutation test,  $p=0.702$ , Hedges'  $g=0.22$ ; low precision groups mean  
 120 difference in LI=0.022, exact permutation test,  $p=0.615$ , Hedges'  $g=0.27$ ). We obtained the same  
 121 results when we quantified learning on the basis of orientation discrimination thresholds

122 (Supplemental Fig. S1) and when we trained with a different range of spatial frequencies (1.70, 2.54  
123 and 2.76 cpd) in the high precision, high variability group (Supplemental Fig. S2). **B.** To test the  
124 specificity of learning, a new SF was presented to the subjects after the last training session. After high  
125 precision training, learning was specific for the group trained with low variability (mean SI=0.35,  
126 permutation test,  $p=0.031$ , Hedges'  $g=1.81$ ). In contrast, subjects that were trained on the same high  
127 precision task but with varying SFs fully generalized to the new SF (mean SI=-0.56, permutation test,  
128  $p=0.047$ , Hedges'  $g=-1.38$ ). Accordingly, there was a statistically significant difference between low  
129 and high variability training within the high precision group (mean difference in SI=0.91, exact  
130 permutation test,  $p=0.004$ , Hedges'  $g=2.16$ ). Both low precision groups showed generalization (low  
131 variability mean SI=-0.06, permutation test,  $p=0.969$ , Hedges'  $g=-0.15$ ; high variability mean SI=-0.35,  
132 permutation test,  $p=0.078$ , Hedges'  $g=-1.10$ ), with no difference between them (mean difference in  
133 SI=0.29, permutation test,  $p=0.317$ , Hedges'  $g=0.58$ ). We obtained the same results when we  
134 quantified specificity on the basis of orientation discrimination thresholds (Supplemental Fig. S1) and  
135 after training with a different range of spatial frequencies (1.70, 2.54 and 2.76 cpd) in the high  
136 precision, high variability group (Supplemental Fig. S2). **C.** We also tested whether subjects could  
137 perform the transfer task at a new location. Here, training variability shaped specificity and  
138 generalizability of learning similarly in the high and low precision regimes (low variability mean  
139 difference in SI=0.92, exact permutation test,  $p=0.033$ , Hedges'  $g=1.14$ ; high variability mean  
140 difference in SI=0.81, permutation test,  $p<0.0001$ , Hedges'  $g=1.65$ ): low variability groups both show  
141 specificity (mean SI 0.72 and 0.50, respectively; permutation test,  $p=0.016$ , Hedges'  $g=2.12$ , and  
142  $p=0.016$ , Hedges'  $g=1.84$ ). In contrast, training with high variability led to generalization (mean SI -  
143 0.20 and -0.31, respectively; permutation test,  $p=0.703$ , Hedges'  $g=-0.25$ , and  $p=0.203$ , Hedges'  $g=-$   
144 0.69). We obtained the same results when we quantified specificity on the basis of orientation  
145 discrimination thresholds (Supplemental Fig. S1). In all panels, \*\*\* stand for  $p<0.001$ , \*\* for  $p<0.01$ ,  
146 and \* for  $p<0.05$ . Error bars reflect the standard error of the mean, circles reflect individual subjects.

147

148 We then tested generalization of PL in the four groups. For analyses, we computed the "Specificity  
149 Index" (SI,<sup>16</sup>), which quantifies how much of the learning improvement can be carried over to  
150 previously untrained conditions. Positive SI values indicate that learning is specific, i.e., does not  
151 transfer to new conditions, whereas SI values smaller than or equal to 0 indicate generalization.

152 We first challenged subjects with a new, untrained SF (0.96 cpd) outside the SF channels of the closest  
153 trained SFs. A  $2 \times 2$  analysis of variance (ANOVA) of the four SIs revealed a statistically significant  
154 interaction between the factors precision and variability (Fig. 2B,  $F(1, 24)=4.52$ ,  $p=0.044$ , partial



155  $\eta^2=0.11$ ): PL in the high precision, low variability group was highly specific to the trained SF (Fig. 2B  
156 left, mean SI=0.35, permutation test,  $p=0.031$ , Hedges'  $g=1.81$ ), as would be expected from a classical  
157 PL training paradigm with only a single SF. In contrast, subjects that were trained on the same high  
158 precision task but with varying SFs fully generalized to the new SF and in fact showed negative SI  
159 (mean SI=-0.56, permutation test,  $p=0.047$ , Hedges'  $g=-1.38$ ), implying that they even continued to  
160 improve their performance in the transfer task. To rule out that generalization to 0.96 cpd was due to  
161 the bracketing of this new SF by two trained SFs (0.53 and 1.7 cpd) in the high variability group,  
162 compared to only one SF (1.7 cpd) in the low variability group, we additionally performed the same  
163 experiment in a new group of subjects trained at 1.7, 2.54, and 2.76 cpd. Here, variability also led to  
164 better generalization than low variability in the absence of bracketing (Supplemental Fig. S2B). The  
165 results from high precision training thus suggest that task-irrelevant variability indeed enables  
166 generalization in PL.

167 In the low precision group, a different picture emerged (Fig. 2B right). Here, both low and high  
168 variability training led to good generalization with SIs not significantly different from 0 (low variability  
169 mean SI=-0.06, permutation test,  $p=0.969$ , Hedges'  $g=-0.15$ ; high variability mean SI=-0.35,  
170 permutation test,  $p=0.078$ , Hedges'  $g=-1.10$ ), and no statistically significant difference between both  
171 training regimes (mean SI difference=0.29, exact permutation test,  $p=0.317$ , Hedges'  $g=0.58$ ). This is  
172 in accordance with previous PL studies showing that easy tasks generalize well<sup>16</sup> (but see below).

173 The results from the SF transfer condition suggest that high variability and low precision both enable  
174 generalization. Given that subjects trained with high precision or low variability could perform the task  
175 in a SF band that lay outside the trained SF range is indicative of a strategy involving SF-invariant  
176 neurons. These neurons are more prevalent in higher order visual cortex, where neurons also have  
177 larger receptive fields<sup>17</sup>. We thus hypothesized that if subjects relied on invariant neurons (and not  
178 many narrowly tuned neurons which are more prevalent in early visual areas), they should also show  
179 transfer to new spatial locations. This is because trained and untrained locations would be covered by  
180 the same receptive fields. We thus moved the stimuli to a new, iso-eccentric location in the same  
181 quadrant 8 dva from the original training location and repeated the transfer task there.

182 Here, we find that all groups trained with only one SF cannot transfer their learning gains to the new  
183 location, irrespective of the required precision in the orientation discrimination task (mean SI 0.72 and  
184 0.50, respectively; permutation test,  $p=0.016$ , Hedges'  $g=2.12$ , and  $p=0.016$ , Hedges'  $g=1.84$ ). In  
185 contrast, both groups that were trained with variable SFs were able to generalize (mean SI -0.20 and  
186 -0.31, respectively; permutation test,  $p=0.703$ , Hedges'  $g=-0.25$ , and  $p=0.203$ , Hedges'  $g=-0.69$ ). This  
187 was also evident in terms of a main effect of variability in the ANOVA (Fig. 2C,  $F(1,24)=23.08$ ,  $p<0.0001$ ,

188 partial  $\eta^2=0.32$ ; all other  $p>0.27$ , partial  $\eta^2<0.02$ ). These results suggest that learning with variability  
 189 indeed taps on SF-invariant neurons with larger receptive fields than classical PL with only a single SF  
 190 band.

191 To gain further insight into the computations underlying generalization after high variability training,  
 192 we repeated the same experiments in a DNN purpose built for PL<sup>14</sup>. This network, which is derived  
 193 from the general AlexNet architecture<sup>18</sup>, recapitulates several known behavioral and physiological PL  
 194 effects, e.g., higher learning rates for low precision tasks<sup>16</sup> and the sharpening of tuning curves as a  
 195 result of training that has originally been observed in the primary visual cortex of non-human  
 196 primates<sup>19</sup>.

197

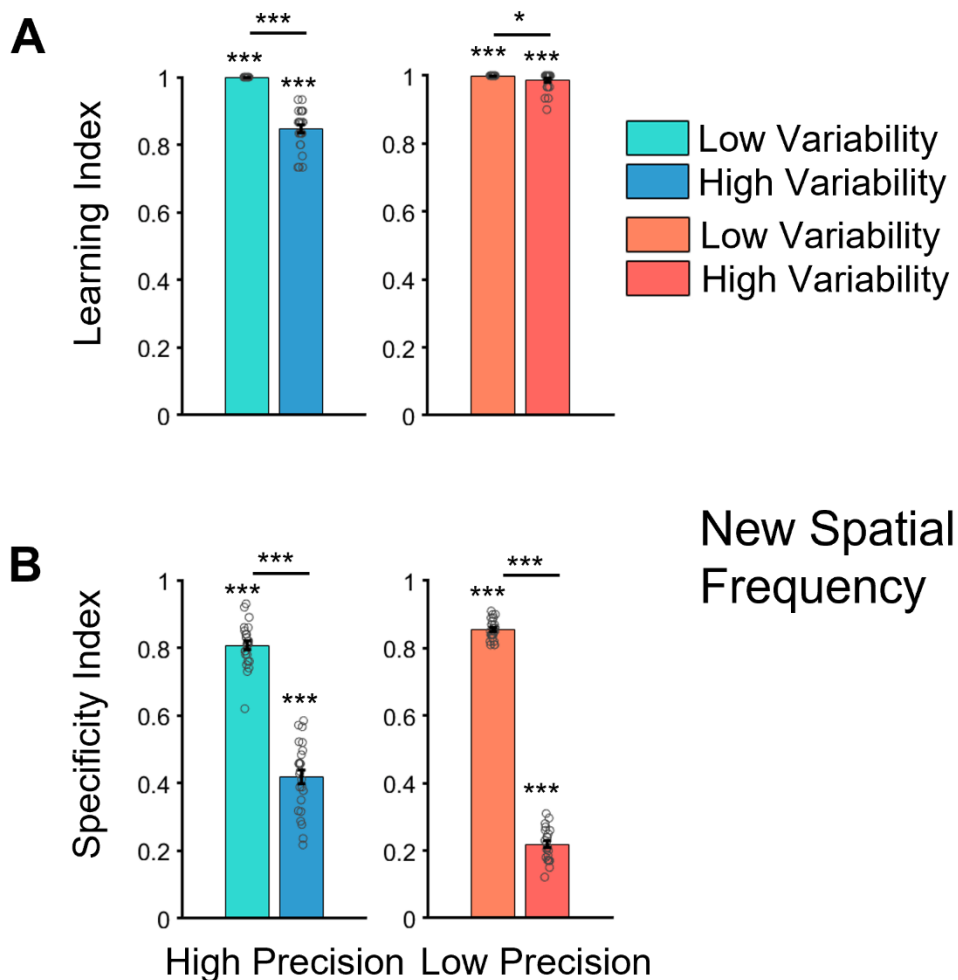

198

199 **Figure 3: Learning and generalization in deep neural networks.** A. We found significant learning  
 200 effects across all four training regimes with high learning levels (mean LI of 1, 0.85, 1 and 0.98  
 201 respectively, all  $p<0.0001$ ,  $t(24)>14.01$ ). Input variability led to lower LIs than training without  
 202 variability (high precision groups mean difference in LI=0.152,  $t(48)=12.97$ ,  $p<0.0001$ , Hedges'  $g=3.61$ ;

203 low precision groups mean difference in LI=0.013,  $t(48)=2.44$ ,  $p=0.006$ , Hedges'  $g=0.69$  ) **B**. When the  
204 networks were fed with stimuli at a new untrained SF, we found specificity in all four groups (mean SI  
205 0.81, 0.42, 0.85, and 0.22, respectively, all  $p<0.0001$ ,  $t(24)>3.96$ ). Importantly, the difference in  
206 learning specificity was strongly affected by training variability (high precision groups mean difference  
207 in SI=0.39,  $t(48)=16.03$ ,  $p<0.0001$ , Hedges'  $g=4.46$ ; low precision groups mean difference in SI=0.64,  
208  $t(48)=55.29$ ,  $p<0.0001$ , Hedges'  $g=15.39$ ). In all panels, \*\*\* stand for  $p<0.001$ , \*\* for  $p<0.01$ , and \* for  
209  $p<0.05$ . Error bars reflect the standard error of the mean, circles reflect individual simulations.

210

211 We trained this network with our four training paradigms, crossing the factors precision and  
212 variability, as in our human subjects. Each condition was simulated 25 times over 360 training steps.  
213 When considering the final performance on the trained task, we again find statistically significant  
214 learning effects in all four groups (Fig. 3A; mean LI 1, 0.85, 1, and 0.98, respectively, all  $p<0.0001$ , all  
215  $t(24)>72.36$ , all Hedges'  $g>14.01$ ). Yet, in contrast to human subjects, there is a significant interaction  
216 between variability and precision in LIs ( $F(1,96)=115.17$ ,  $p<0.0001$ , partial  $\eta^2=0.54$ ), with a larger  
217 difference between high and low variability training in the high precision than the low precision  
218 simulations (mean difference in LI=0.138,  $p<0.0001$ , Hedges'  $g=2.99$ ). This difference notwithstanding,  
219 critically, when we challenge the network with a new, untrained SF, we observe a differential pattern  
220 of generalization performance that resembles what we found in human observers, most clearly in the  
221 high precision training regime: networks trained with variable SFs show better transfer to a new SF  
222 than networks trained with only a single SF (Fig. 3B; mean difference in SI=0.39,  $t(48)=16.03$ ,  $p<0.0001$ ,  
223 Hedges'  $g=4.46$ ). We obtain a similar result with low precision (mean difference in SI=0.64,  
224  $t(48)=55.29$ ,  $p<0.0001$ , Hedges'  $g=15.39$ ). Across training regimes, variability explained most between-  
225 group variance (variability main effect  $F(1, 96)=1457.58$ ,  $p<0.0001$ , partial  $\eta^2=0.94$ , compared to  
226 precision main effect  $F(1, 96)=32.18$ ,  $p<0.0001$ , partial  $\eta^2=0.25$ , and interaction  $F(1, 96)=85.01$ ,  
227  $p<0.0001$ , partial  $\eta^2=0.47$ ). Hence, while training leads to different LIs and more specific learning  
228 effects in DNNs than in humans, the overall pattern of generalization results bears resemblance  
229 between our in vivo and in silico results.

230 To dissociate a generalization strategy relying on SF-invariant orientation representations from a  
231 specialization strategy relying on units narrowly tuned to SF and orientation, we then investigated  
232 how representations in the DNN changed as a function of training. Since the amount of training  
233 involved in the network simulations cannot easily be related to the number of trials seen by human  
234 observers, we correlated the pattern of results that we obtained with humans to the pattern of  
235 transfer results after 2, 5, 15, 35, 45, 50, 100, and 360 training steps of the networks. We find the

236 highest correspondence between in vivo and in silico experiments after 100 training steps (correlation  
 237 of SI between human subjects and DNNs,  $r=0.81$ ,  $p<0.0001$ ). We used the simulation results from this  
 238 training step for all subsequent analyses. To compare the two strategies, we computed the number of  
 239 units tuned to the trained SF and a SF-invariant orientation tuning index (SIOI) and for each of the 5  
 240 layers of the DNN (see STAR methods).

241

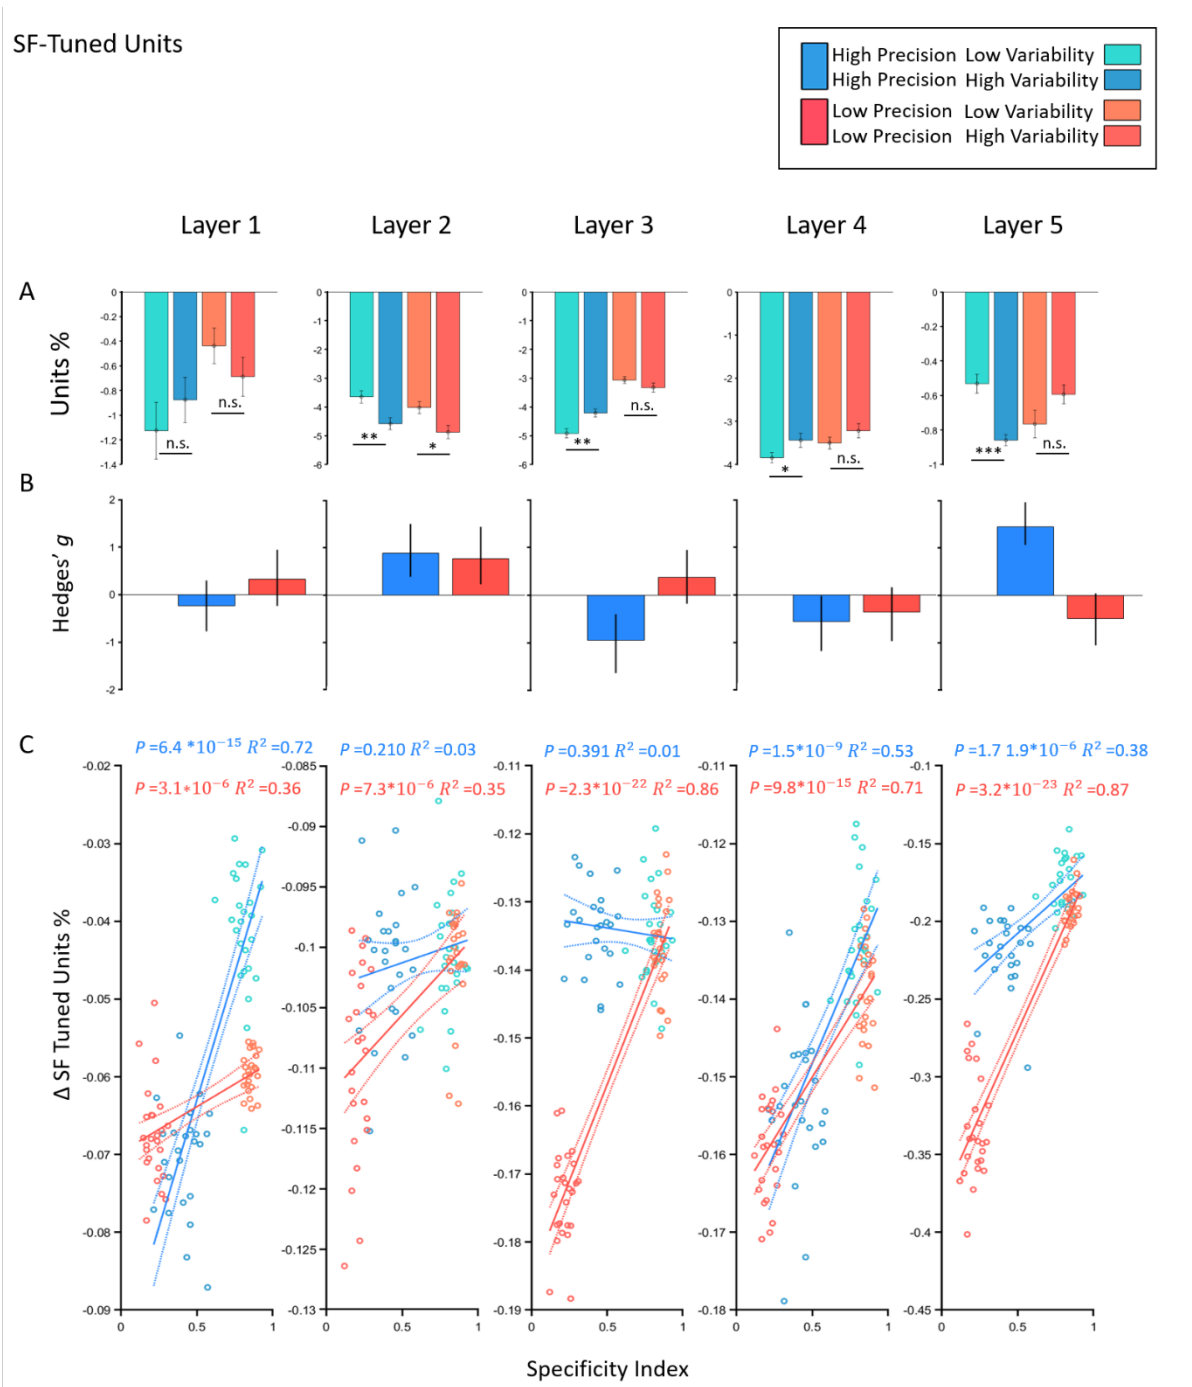

242

243 **Figure 4: Effects of learning on the number of SF-tuned units. A.** The number of SF-tuned units  
244 decreases significantly across all layers and all groups (all  $p < 0.003$ ). Error bars reflect the standard  
245 error of the mean. \*\*\* stand for  $p < 0.001$ , \*\* for  $p < 0.01$ , and \* for  $p < 0.05$ . **B.** The effect size for  
246 comparing the change in the number of SF-tuned units between low and high variability groups  
247 (expressed as Hedges'  $g$ ) varies in size and direction across layers and training regimes (0.24 and 0.32  
248 for layer 1; 0.88 and 0.77 for layer 2; -0.94 and 0.37 for layer 3; -0.56 and -0.36 for layer 4 and 1.44  
249 and -0.49 for layer 5). Error bars reflect the 95% confidence interval of the effect size. **C.** The change  
250 in the number of SF-tuned units is predictive of learning specificity in layer 1 ( $r = 0.85$ ,  $p < 0.0001$ ,  
251  $R^2 = 0.72$ ), layer 4 ( $r = 0.73$ ,  $p < 0.0001$ ,  $R^2 = 0.53$ ), and layer 5 ( $r = 0.62$ ,  $p < 0.0001$ ,  $R^2 = 0.38$ ) in high precision  
252 training (all other layers magnitude  $r < 0.02$ ,  $p > 0.210$ ,  $R^2 < 0.03$ ), and in all layers in low precision training  
253 (all  $r > 0.59$ ,  $p < 0.0001$ ,  $R^2 > 0.34$ ). Dotted lines reflect 95% confidence intervals.

254

255 We find that instead of increasing, learning significantly decreases the number of SF-tuned across all  
256 layers (Fig. 4A and Supplemental Table S1). Hence, a specialization strategy is unlikely to explain our  
257 results. The decrease in the number of SF-tuned neurons differentiated high from low variability  
258 training in several layers (Fig. 4B and Supplemental Table S1) and was predictive of learning specificity  
259 (Fig. 4C) in layer 1 ( $r = 0.85$ ,  $p < 0.0001$ ,  $R^2 = 0.72$ ), layer 4 ( $r = 0.73$ ,  $p < 0.0001$ ,  $R^2 = 0.53$ ), and layer 5 ( $r = 0.62$ ,  
260  $p < 0.0001$ ,  $R^2 = 0.38$ ) in high precision training (all other layers magnitude  $r < 0.02$ ,  $p > 0.210$ ,  $R^2 < 0.03$ ),  
261 and in all layers in low precision training (all  $r > 0.59$ ,  $p < 0.0001$ ,  $R^2 > 0.34$ ). This provides a first hint at a  
262 generalization strategy. We thus turned to SIOI to further investigate the relationship between  
263 invariance and generalization. Indeed, we find that SF-invariant orientation tuning as quantified by  
264 SIOI increases as a function of training, especially in the high variability groups, with the largest effects  
265 in the top layer of the DNN (see Fig. 5A, B and Supplemental Table S2). Furthermore, from layer 1  
266 onwards, SIOI predicts generalization on the transfer task (Fig. 5C) in high precision training (layer 1  
267  $r = -0.30$ ,  $p = 0.035$ ,  $R^2 = 0.09$ ; layer 2  $r = -0.88$ ,  $p < 0.0001$ ,  $R^2 = 0.77$ ; layer 3  $r = -0.85$ ,  $p < 0.0001$ ,  $R^2 = 0.72$ ; layer  
268 4  $r = -0.86$ ,  $p < 0.0001$ ,  $R^2 = 0.74$ ; layer 5  $r = -0.89$ ,  $p < 0.0001$ ,  $R^2 = 0.78$ ) and low precision training (layer 1  $r =$   
269  $0.78$ ,  $p < 0.0001$ ,  $R^2 = 0.61$ ; layer 2  $r = -0.95$ ,  $p < 0.0001$ ,  $R^2 = 0.90$ ; layer 3  $r = -0.98$ ,  $p < 0.0001$ ,  $R^2 = 0.96$ ; layer  
270 4  $r = -0.98$ ,  $p < 0.0001$ ,  $R^2 = 0.96$ ; layer 5  $r = -0.97$ ,  $p < 0.0001$ ,  $R^2 = 0.97$ ). This suggests that variability-induced  
271 generalization in PL could indeed rely on a recruitment (or emergence) of invariant representations  
272 that provide orientation information irrespective of SF.

273

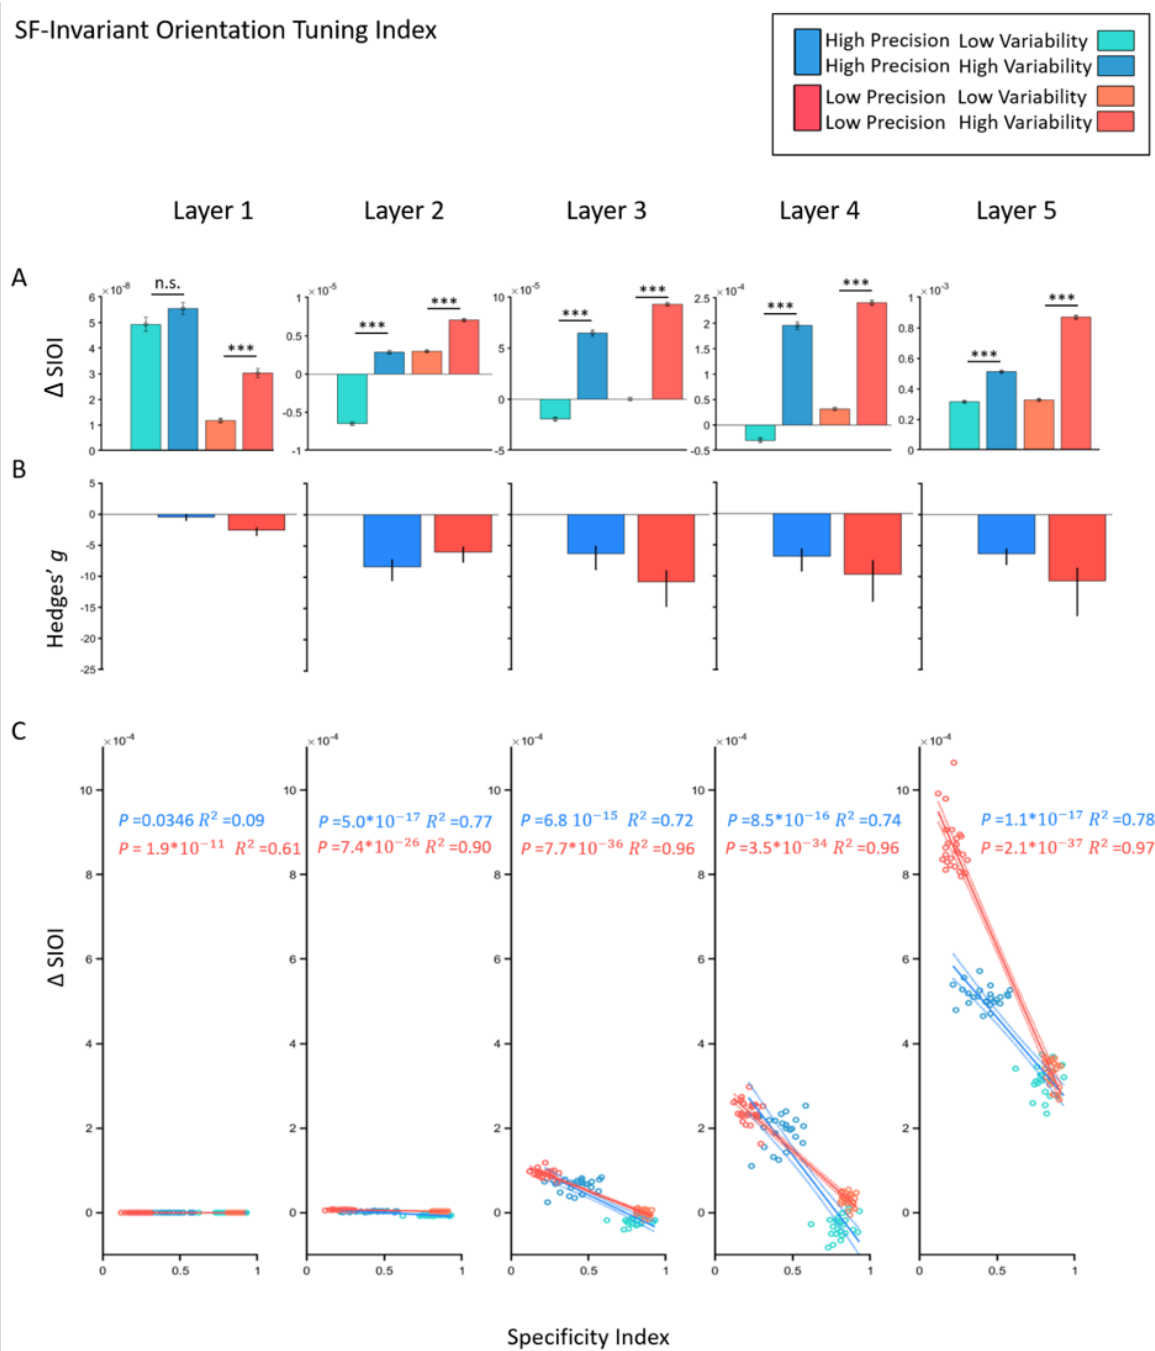

274

275 **Figure 5: Effects of learning on SF-invariant orientation tuning. A.** With low precision training, SIOI  
 276 increases significantly (all  $p < 0.0001$ ) over training in all layers (with the exception of layer 3, where  
 277 there is no change in SIOI for low variability training,  $p = 0.994$ ). This general trend is conserved for high  
 278 precision, high variability training (all  $p < 0.0001$ ), while the low variability group shows significant SIOI  
 279 decreases in layers 2, 3 and 4 (all  $p < 0.0001$ ). Error bars reflect the standard error of the mean. \*\*\*  
 280 stand for  $p < 0.001$ , \*\* for  $p < 0.01$ , and \* for  $p < 0.05$ . **B.** The effect size for comparing the change in SIOI  
 281 between low and high variability groups (expressed as Hedges' *g*) differentiates high from low  
 282 variability training in all layers for high and low precision and increases across layers (-0.48 and -2.60

283 for layer 1; -8.33 and -6.00 for layer 2; -6.34 and -10.91 for layer 3; -6.83 and -9.70 for layer 4 and -  
284 6.37 and -10.68 for layer 5). Error bars reflect the 95% confidence interval of the effect size. **C.** A strong  
285 negative correlation between SIOI and SI is found from layer 1 onwards (all  $p < 0.035$ ) and increases  
286 over layers. Dotted lines reflect 95% confidence intervals.

## 287 **Discussion**

288 We find that variability enables generalization in PL, beyond the generalization benefits that have been  
289 reported in low precision tasks. Variability-induced generalization outside the trained SF band and far  
290 from the trained location overcomes two of the hallmarks of PL, namely stimulus and location  
291 specificity. Our results in human subjects align with the known tuning properties of SF-invariant  
292 neurons in the primate visual system. A role of such neurons in generalization is further suggested by  
293 our *in silico* results, which show that networks trained with variable stimuli evolve SF-invariant  
294 representations of orientation with training.

295 Traditionally, PL protocols have not involved variability, training with a minimal number of stimuli  
296 instead. This has led to many important insights, but mostly on extremely specific PL effects. E.g.,  
297 simply showing stimuli to a different eye after monocular training can completely abolish learning  
298 effects<sup>20</sup>. By eliminating variability and presenting the same stimuli over and over, traditional PL  
299 paradigms may have unwittingly promoted ‘memorization’ or ‘overfitting’ of specific stimuli instead  
300 of generalization<sup>11</sup>. Variability during training endows the visual system with more robustness towards  
301 changes in the stimulus material. This also makes PL less “strange”: the high specificity of PL has not  
302 been observed in other domains of training – instead, variability has been shown to benefit transfer  
303 in domains as disparate as baseball and soccer practice<sup>21,22</sup>, language learning<sup>23</sup>, and mathematics and  
304 problem solving<sup>24</sup>. Hence, variability as a catalyst or enabler of generalization can be considered a  
305 principle of leaning across domains.

306 Our data suggest that instead of memorizing a small number of specific stimuli, the visual system uses  
307 invariant representations that provide orientation information irrespective of SF. Invariance is thought  
308 to arise from systematic pooling over feature-specific representations. When there is variability in the  
309 inputs, this entails more frequent weight updates for invariant than for feature-specific  
310 representations, because only the former participate in the task on every trial. Furthermore, relying  
311 on invariant representations suggests that fewer neurons need to undergo plasticity than in a  
312 specialization strategy, hence reducing overall metabolic cost. Invariant representations for  
313 orientation exist, e.g., in VTC, where neurons represent the orientation of simple stimuli like gratings  
314 independently of other stimulus properties such as color or spatial frequency<sup>25,26</sup>. Although not as  
315 frequently studied as orientation representations, e.g., in the primary visual cortex, these higher order

316 visual neurons have been shown to be causally relevant for orientation discrimination<sup>27</sup>. It has also  
317 been shown electrophysiologically that orientation tuning of neurons in higher order visual cortex is  
318 less accurate than in early visual areas<sup>12</sup>. This is one of the bases of the Reverse Hierarchy Theory  
319 (RHT)<sup>16</sup> that has previously put forward that easier tasks are learned on the basis of neurons in higher  
320 order visual cortex, whereas difficult tasks require high precision information available in early visual  
321 areas. Our results are in line with RHT, as subjects trained in the low precision task showed  
322 generalization to new SFs even if originally trained only with a single SF. However, variability during  
323 training led to overall lower SIs and extended generalization to new locations, even when the task was  
324 difficult. Hence, variability needs to be considered as an additional relevant dimension beyond task  
325 difficulty in enabling generalization of PL.

326 The pattern of SF and location transfer differed across the four training regimes in a way that may be  
327 informative regarding the physiological basis of the effects we observed. In particular, in the high  
328 precision groups, transfer to a new SF *and* to a new location only occurred under conditions of high  
329 variability. In the low precision group, SF transfer occurred in both the high and low variability groups,  
330 but location transfer was only evident after high variability training. This pattern of results suggests  
331 that visual PL could involve (at least) three populations of neurons depending on the training regime,  
332 namely: 1. neurons tuned to SF and location, as they are commonly found in early visual cortex; these  
333 neurons could explain the SF and location specificity in the high precision, low variability group. 2.  
334 neurons invariant to SF but not location, as they can be found at intermediate stages of visual  
335 processing; these neurons could explain concomitant transfer across SF and specificity for location in  
336 the low precision, low variability group. 3. neurons invariant to location and SF, which can be found in  
337 higher visual cortex, and which could explain transfer across SF and location in the high variability  
338 training groups across precision levels. Overall, this suggests that the contribution of lower versus  
339 higher visual areas in PL is not fixed but may depend on the variability of the training regime, which  
340 can be parsimoniously explained by a single principle, invariance (in space and SF, respectively). Future  
341 studies could test whether this also holds for other feature combinations.

342 Traditional PL theories have highlighted the specificity of PL<sup>28</sup>, but more recent studies have identified  
343 conditions other than variability under which PL can generalize (for a recent review, see <sup>29</sup>). For  
344 example, in so-called ‘double training’ paradigms, practicing two tasks enables transfer across  
345 locations<sup>30</sup>, and in ‘training-plus-exposure’ paradigms, simultaneous or subsequent passive exposure  
346 to additional stimuli enables transfer across orientations<sup>31</sup>. It has also been proposed that  
347 counteracting adaptation that may arise during prolonged training can be beneficial for  
348 generalization<sup>32</sup>. To this end, task-irrelevant ‘dummy’ trials can be interspersed with the main task,  
349 which is akin to introducing task-irrelevant variability. We did not observe statistically significant



350 adaptation effects in our data (Supplemental Fig. S4), possibly because we minimized stimulus-specific  
351 adaptation by randomizing phase from trial to trial. However, our experiments were not specifically  
352 designed to investigate the role of adaptation. To what extent the above-mentioned training  
353 paradigms can be understood under the same principle(s) remains an interesting and very relevant  
354 question.

355 Our results highlight (at least) three objectives for future studies: First, they suggest new targets for  
356 electrophysiological recordings investigating PL in non-human primates, namely higher order visual  
357 areas in VTC. Neurons in these areas code for orientation, are invariant to low-level features, and have  
358 large spatial receptive fields, and could thus support the generalization of PL we observed. Yet, studies  
359 investigating PL in these areas are, by and large, inexistent (but see<sup>33</sup>). Second, our results suggest that  
360 stimulus variability-induced generalization is a robust principle of learning across many learning  
361 domains, including vision, that may be strategically used in machine learning to achieve out of sample  
362 generalization. Replacing ad hoc data augmentation strategies by biologically inspired principles may  
363 lead to more robust models that may also align better with human perception. Finally, in terms of  
364 application of VPL<sup>34</sup>, where generalization is key, it may prove beneficial to counteract overtraining by  
365 varying stimuli in task-irrelevant dimensions.

366

### 367 **Acknowledgements**

368 We would like to thank Marina Berg for help with data acquisition. This project has received funding  
369 from the European Research Council (ERC) under the European Union's Horizon 2020 research and  
370 innovation programme (Grant agreement No. 802482, to CMS). CMS is supported by the German  
371 Research Foundation Emmy Noether Program (SCHW1683/2-1).

372

### 373 **CRedit author statement**

374 G.M., Methodology, Investigation, Formal Analysis, Visualization, Data curation, Writing – original  
375 draft preparation; A.S.D., Software; C.M.S., Conceptualization, Methodology, Writing – original draft  
376 preparation, Supervision, Project administration, Funding acquisition.

377

### 378 **Declaration of interests**

379 The funders had no role in study design, data collection and interpretation, decision to publish, or  
380 preparation of the manuscript. ASD is a founder of Neuro-Inspired Vision and a member of its scientific  
381 advisory board. GLM and CMS declare no competing financial interests.

382

## 383 **STAR METHODS**

### 384 **RESOURCE AVAILABILITY**

#### 385 **Lead contact**

386 Further information and requests for resources and reagents should be directed to and will be fulfilled  
387 by the lead contact, Caspar M. Schwiedrzik ([c.schwiedrzik@eni-g.de](mailto:c.schwiedrzik@eni-g.de)).

#### 388 **Materials availability**

389 This study did not generate new unique reagents.

#### 390 **Data and code availability**

- 391 • All human behavioral data are available for download on (link available after journal  
392 acceptance).
- 393 • The deep neural network is available from the original authors on Github  
394 ([https://github.com/kevin-w-li/DNN\\_for\\_VPL](https://github.com/kevin-w-li/DNN_for_VPL)).
- 395 • Any additional information required to reanalyze the data reported in this paper is available  
396 from the lead contact upon request.

397

## 398 **EXPERIMENTAL MODEL AND SUBJECT DETAILS**

### 399 **Human Participants**

400 A total of 60 healthy human volunteers (34 female, 10 left-handed, mean age 28 yrs, SD 8.4 yrs)  
401 participated in this study: 37 in the main experiments (20 female, 6 left-handed, mean age 28 yrs, SD  
402 7.2 yrs), 7 in a pilot experiment for the range of SFs (3 female, 0 left-handed, mean age 30 yrs, SD 10.5  
403 yrs), 7 in a control experiment for potential pre-existing differences at the training and transfer  
404 location (5 female, 1 left-handed, mean age 26 yrs, SD 3.8 yrs), and 9 to test for an effect of differential  
405 bracketing of SFs (6 female, 3 left-handed, mean age 31 yrs, SD 9 yrs). All subjects had normal or  
406 corrected-to-normal vision, no neurological or psychiatric disease, and gave written informed consent  
407 before participation in accordance with the Declaration of Helsinki. Sample size was selected based  
408 on previous studies. Subjects were randomly assigned to one of four training groups (crossing the

409 factors precision (high/low) and variability (high/low), see below). All procedures were approved by  
410 the Ethics Committee of the University Medical Center Göttingen (protocol number 29/8/17).

## 411 **METHOD DETAILS**

### 412 **General setup**

413 All subjects were trained on a two alternative forced choice (2AFC) orientation discrimination task  
414 with oriented gratings. Training lasted 2 to 5 days with one training session per day. Transfer tasks  
415 were conducted later depending on subject availability (mean interval 2.6 days). Total training and  
416 transfer time was 4 to 7 days. Stimuli were presented on an LCD monitor (ViewPixx EEG, refresh rate  
417 120 Hz, resolution 1920 × 1080 pixel, viewing distance 65 cm) in a darkened, sound-attenuating booth  
418 (Desone Modular Acoustics). Subjects viewed the screen through an elliptical aperture that covered  
419 the screen edges. Stimulus delivery and response collection were controlled using Psychtoolbox<sup>35</sup>  
420 running in Matlab (The Mathworks, Inc.). Auditory feedback was delivered via headphones  
421 (Sennheiser HDA 280). During all experiments, we continuously acquired pupil and gaze  
422 measurements using a high-speed, video-based eye tracker (SR Research Eyelink 1000+). Data were  
423 sampled at 1000 Hz from both eyes. Subjects were paid €8 per hour. To assure constant motivation  
424 over the training sessions, subjects received a bonus of €2 if they improved by 10% from the previous  
425 training session.

### 426 **Stimuli and task**

427 On each trial, subjects had to decide whether a monopolar, monochromatic Gabor grating (size 3.1  
428 dva, luminance 43.4 cd/m<sup>2</sup>) was tilted clockwise or counterclockwise with respect to a reference  
429 stimulus. The reference stimulus was a monopolar, monochromatic Gabor grating with identical size  
430 and constant spatial frequency (SF, 2.56 cpd) which was randomly tilted per subject, avoiding  
431 meridians and diagonals. The task stimuli were presented in ten linearly spaced difficulty levels  
432 clockwise and counterclockwise from the reference, respectively. Each condition was presented 21  
433 times. In addition, we presented the reference orientation 21 times, amounting to a total of 441 trials  
434 per session evenly distributed among four blocks. In the high precision training groups, difficulty levels  
435 ranged from 0.5 to 2.75 deg, while in the low precision groups, orientation differences ranged from 3  
436 to 5.25 deg. In the low variability groups, all stimuli were presented at a single SF (1.70 cpd). In the  
437 high variability groups, we used three SFs (0.53, 1.70 and 2.76 cpd). We chose these SFs such that they  
438 lie outside the other spatial frequency channels (including the one used for transfer, see below), or  
439 exactly at full width half maximum (FWHM), with the exception of 1.7 cpd which just falls into the 2.76  
440 cpd band. For this, we assumed a SF channel bandwidth of 1.4 octaves<sup>36</sup> (but see <sup>37</sup>). In all groups,

441 stimuli were presented in pseudo-random order at 12.4° eccentricity against a grey background (39.5  
442 cd/m<sup>2</sup>). Phase varied randomly between 0° and 360° from trial to trial.

443 On each trial, we first presented the reference stimulus for 2000 ms. This was followed by a 1000 ms  
444 fixation period. Then, two grey saccade placeholders (luminance 23.54 cd/m<sup>2</sup>) appeared for 1500 ms,  
445 followed by the stimulus for 250 ms. After a random delay of 500-3000 ms, the choice phase started,  
446 which was indicated by a color change of the placeholders. To respond, subjects had to direct their  
447 gaze from the fixation point (size 0.31 dva, luminance 0.28 cd/m<sup>2</sup>) at the center of the screen to a red  
448 target (luminance 23.53 cd/m<sup>2</sup>) if the stimulus was rotated counterclockwise or to an isoluminant  
449 green target if it was rotated clockwise. Note that although SF and orientation are not independently  
450 processed in the visual system, we rendered SF task-irrelevant by instructing subjects to consider only  
451 orientation for their task. The assignment of colors to the placeholder locations was pseudo-  
452 randomized. Subjects had to reach the target at 12 dva distance within 1000 ms. Subjects were  
453 instructed to respond as accurately as possible. Feedback on accuracy was provided by playing a low  
454 pitch sound (incorrect) or a high pitch sound (correct) for 500 ms. The next trial started between 300  
455 and 2000 ms later. If subjects did not respond in time or if they broke fixation (fixation window size  
456 4.5 dva), the low pitch sound was played, and the trial was repeated later during the block. To keep  
457 subjects motivated, the high pitch sound increased in loudness after the first 2 and 3 sequential correct  
458 trials. Loudness was reset to the original level at the first incorrect trial.

459 Subjects were free to take breaks between blocks. There were additional breaks in the middle of each  
460 block to display feedback about performance. As a reminder, the reference was shown for 2000 ms at  
461 the center of the screen before and in the middle of each block (in total 8 times per session). Before  
462 each training session, subjects performed 16 warm-up trials.

### 463 **Transfer conditions**

464 Subjects had to reach at least 0.05 Learning Index (see below) improvement and show stable  
465 performance compared to the end of the preceding training session before we transitioned to the first  
466 transfer session. Subjects generally required between 2 and 5 days to reach this criterion, and there  
467 were no statistically significant differences in the amount of training days to reach criterion between  
468 the groups ( $F(3,24)=0.71$ ,  $p=0.553$ , partial  $\eta^2=0.21$ ). For the first transfer test, we asked all subjects to  
469 perform the same task as during training, but we changed the SF of the task stimuli to a new, unseen  
470 SF (0.96 cpd). This SF was chosen to lie outside the FWHM of SF channels around the closest SFs used  
471 for training (0.53 cpd and 1.7 cpd), assuming a channel bandwidth of 1.4 cpd<sup>36</sup>. Pilot experiments  
472 showed that baseline performance at 0.96 cpd did not differ from baseline performance in the SFs  
473 used for training (Supplemental Fig. S3). Subjects performed 441 trials within a single transfer session.

474 The SF of the reference remained identical. The interval between the last training session and the  
475 transfer session varied between subjects (mean 2.6 days), but there were no significant differences  
476 between the groups ( $F(3,24)=0.1$ ,  $p=0.957$ , partial  $\eta^2=0.01$ ). Furthermore, there was no significant  
477 correlation between Specificity Indices (see below) and this interval (Pearson correlation,  $r=0.1031$ ,  
478  $p=0.6015$ ). For the second transfer test, we changed the location of the transfer stimuli to a new, iso-  
479 eccentric position in the same quadrant 8 deg away from the original training location. Pilot  
480 experiments showed that there were no systematic preexisting differences in orientation  
481 discrimination performance between the training and the transfer location (mean difference in  
482 accuracy 2%, permutation test,  $p=0.28$ , Hedges'  $g=0.21$ ). Subjects again performed 441 trials within a  
483 single session.

484

### 485 **Deep Neural Network Simulations**

486 The deep learning model used in this paper was adopted from<sup>14</sup>. The model was implemented in  
487 PyTorch (version 1.10.0) and consists of two parallel streams, each encompassing the first five  
488 convolutional layers of AlexNet<sup>18</sup> plus one fully connected layer which gives out a single scalar value.  
489 One stream accepts one fixed reference stimulus and the other stream accepts one varying target  
490 stimulus. The target stimulus is then compared to the reference stimulus. After the fully connected  
491 layers, the outputs of the two parallel streams – two scalar values - are entered to a softmax layer to  
492 give out one binary value which indicates the relative orientation (clockwise or counter-clockwise) of  
493 the target stimulus relative to the reference stimulus. We used the same feature maps and kernel size  
494 as the original paper. Each stimulus had 32×32 pixel size and was centered inside a 256×256 pixel  
495 image which was cropped to 224×224 pixel shape to make it consistent with the input size of AlexNet.  
496 All stimuli had homogenous gray background. The reference stimulus had a fixed orientation of 236°  
497 and a SF of 2.56 cpd. While keeping the same orientation and spatial frequency combination as for  
498 human subjects, we simulated four different training regimes, crossing the factors variability and  
499 precision. Each regime was independently trained 25 times. We initialized the five convolutional layers  
500 with pretrained ImageNet weights of AlexNet to mimic a (pretrained) adult brain. The last fully  
501 connected layer was initialized by zero. As for human subjects, we randomized stimulus phase for  
502 training. The training samples per group were set to batch sizes of 20 and 60 stimuli, for low variability  
503 groups and high variability groups, respectively. This ensures that each batch provides all 20  
504 orientations and all SFs but random stimulus phases. By randomizing stimulus phase, we created 7200  
505 and 21600 unique stimuli for the low variability groups and for high variability groups, respectively.  
506 Training parameters were set as follow: learning rate = 0.00001, momentum = 0.9, weight decay =

507 0.0001. The cross-entropy loss function was used as an objective function and optimized via stochastic  
508 gradient descent.

## 509 **QUANTIFICATION AND STATISTICAL ANALYSIS**

510 All data analyses were carried out in Matlab (The Mathworks, Inc.) and R (version 4.2.1, R Core Team,  
511 <https://www.R-project.org>).

### 512 **Human behavior**

513 Human behavioral data were analyzed using (exact) permutation  $t$ -tests (two-sided for comparisons  
514 between groups, and one-sample tests against 0) and analyses of variance (ANOVA). Before fitting  
515 ANOVAs, data were aligned and rank-transformed<sup>38,39</sup> using the ARTool package (version 0.11.1,  
516 <https://github.com/mjskay/ARTool>) to satisfy distributional assumptions. For  $t$ -tests and ANOVAs, we  
517 computed Hedges'  $g$  and partial  $\eta^2$ , respectively, as effect sizes. From the original sample of 37  
518 subjects in the main experiments, 2 subjects did not complete the experiments and were thus  
519 excluded from data analysis. 3 subjects were excluded from further data acquisition after the first  
520 session because they evidently did not follow task instructions. 4 subjects were excluded during data  
521 acquisition because lack of significant learning (but there was no difference in the number of excluded  
522 subjects between high and low variability training regimes,  $p=0.6029$ , odds ratio = 3, Fisher exact test).  
523 The final  $n$  in the main experiment was thus 28 (15 female, 5 left-handed, mean age 28 yrs, SD 7.6 yrs).  
524 Accuracy was defined as the average percentage correct per session. We excluded all trials with  
525 outliers in the reaction times per subject using the estimator  $Sn^{40}$  at a threshold of 8.5. To quantify  
526 learning, we computed the Learning Index (LI)<sup>15</sup>, as follows:

$$527 \quad LI = \frac{Accuracy_{last\ trained} - Accuracy_{baseline}}{Accuracy_{baseline}}$$

528 where baseline accuracy was obtained by averaging the performance of the first session. Because LI  
529 could not be lower than 0, we used one-sided (exact) permutation  $t$ -tests for comparisons against 0.  
530 To quantify transfer, a Specificity Index (SI)<sup>16</sup> was calculated, as follows:

$$531 \quad SI = \frac{Accuracy_{last\ trained} - Accuracy_{transfer}}{Accuracy_{last\ trained} - Accuracy_{baseline}}$$

532 In addition, we fitted psychometric functions (Weibull) using the Palamedes Toolbox<sup>41</sup> to derive  
533 orientation discrimination thresholds per subject and session.

### 534 **Deep Neural Networks**

535 For each simulation, learning and transfer performances were quantified by computing LI and SI as  
536 specified above. Baseline accuracy was obtained after the first training session. To investigate how the  
537 different training conditions affected stimulus representations in the network, the trained networks  
538 were evaluated with a set of stimuli covering all 20 orientations and all three SFs. We then computed  
539 dissimilarities between the average channel activities across all pairwise stimulus combinations using  
540  $\text{abs}(1 - \text{Pearson correlation})$  for each channel pre and post training, respectively. Channels were  
541 identified as SF-sensitive if the sum of the lower triangular matrix was bigger than zero. Furthermore,  
542 we used the average channel activity to generate a representational similarity matrix (RSM) for each  
543 of the five AlexNet layers. To quantify SF-invariant orientation tuning, we computed the SF-invariant  
544 orientation tuning index (SIOI)<sup>42,43</sup> by dividing the mean correlation along the off-diagonals of this RSM  
545 by the mean correlation of all other elements (but the main diagonal). To relate the pattern of  
546 generalization results in humans to that of the deep neural networks, we first computed  
547 representational dissimilarity of SIs separately for humans and deep neural networks. This step  
548 resulted in a 4x4 representational dissimilarity matrix for humans and networks, respectively. In these  
549 matrices, each dimension represents a given training regime, providing us with how dissimilar SIs were  
550 in the four training regimes. Then, we compared the representational geometries of SIs between  
551 humans and networks using Pearson correlation. All statistical analyses were carried out using  
552 parametric *t*-tests (one-sided for LI and changes in SIOI, two-sided for all others), ANOVA, and Pearson  
553 correlation.

554

## 555 **References**

- 556 1. Gold, J.I., and Stocker, A.A. (2017). Visual decision-making in an uncertain and dynamic world.  
557 Annual review of vision science 3, 227-250.
- 558 2. Herault, J., Guyader, N., and Guerin-Dugue, A. (2009). Scene variability and perception  
559 constancy in the visual system: a model of pre-processing before data analysis and learning.  
560 IEEE International Workshop on Machine Learning for Signal Processing, 1-12.
- 561 3. Adini, Y., Wilkowsky, A., Haspel, R., Tsodyks, M., and Sagi, D. (2004). Perceptual learning in  
562 contrast discrimination: the effect of contrast uncertainty. Journal of vision 4, 993-1005.
- 563 4. Yu, C., Klein, S.A., and Levi, D.M. (2004). Perceptual learning in contrast discrimination and the  
564 (minimal) role of context. Journal of vision 4, 169-182.
- 565 5. Herzog, M.H., Aberg, K.C., Fremaux, N., Gerstner, W., and Sprekeler, H. (2012). Perceptual  
566 learning, roving and the unsupervised bias. Vision research 61, 95-99.

- 567 6. Zhaoping, L., Herzog, M.H., and Dayan, P. (2003). Nonlinear ideal observation and recurrent  
568 preprocessing in perceptual learning. *Network* 14, 233-247.
- 569 7. Raviv, L., Lupyan, G., and Green, S.C. (2022). How variability shapes learning and  
570 generalization. *Trends in cognitive sciences* 26, 462-483.
- 571 8. Patarnello, S., and Carnevali, P. (1987). Learning networks of neurons with boolean logic.  
572 *Europhysics letters* 4, 503-508.
- 573 9. Shepard, R.N. (1987). Toward a universal law of generalization for psychological science.  
574 *Science* 237, 1317-1323.
- 575 10. Fahle, M., and Poggio, T., eds. (2002). *Perceptual learning* (MIT Press).
- 576 11. Sagi, D. (2011). Perceptual learning in vision research. *Vision research* 51, 1552-1566.
- 577 12. Vogels, R., and Orban, G.A. (1994). Activity of inferior temporal neurons during orientation  
578 discrimination with successively presented gratings. *Journal of neurophysiology* 71, 1428-  
579 1451.
- 580 13. Fiorentini, A., and Berardi, N. (1980). Perceptual learning specific for orientation and spatial  
581 frequency. *Nature* 287, 43-44.
- 582 14. Wenliang, L.K., and Seitz, A.R. (2018). Deep neural networks for modeling visual perceptual  
583 learning. *Journal of neuroscience* 38, 6028-6044.
- 584 15. Petrov, A.A., Van Horn, N.M., and Ratcliff, R. (2011). Dissociable perceptual-learning  
585 mechanisms revealed by diffusion-model analysis. *Psychonomic Bulletin & Review* 18, 490-  
586 497.
- 587 16. Ahissar, M., and Hochstein, S. (1997). Task difficulty and the specificity of perceptual learning.  
588 *Nature* 387, 401-406.
- 589 17. Tanaka, K. (1996). Inferotemporal cortex and object vision. *Annual review of neuroscience* 19,  
590 109-139.
- 591 18. Krizhevsky, A., Sutskever, I., and Hinton, G.E. (2012). Imagenet classification with deep  
592 convolutional neural networks. *Advances in neural information processing systems* 25.
- 593 19. Schoups, A.A., Vogels, R., Qian, N., and Orban, G.A. (2001). Practising orientation identification  
594 improves orientation coding in V1 neurons. *Nature* 412, 549-553.
- 595 20. Karni, A., and Sagi, D. (1991). Where practice makes perfect in texture discrimination:  
596 evidence for primary visual cortex plasticity. *Proceedings of the national academy of sciences*  
597 *of the united states of america* 88, 4966-4970.
- 598 21. Hall, K.G., Domingues, D.A., and Cavazos, R. (1994). Contextual interference effects with  
599 skilled baseball players. *Perceptual and motor skills* 78, 835-841.



- 600 22. Zetou, E., Papadakis, L., Vernadakis, N., Derri, V., Bebetos, E., and Filippou, F. (2014). The  
601 effect of variable and stable practice on performance and learning the header skill of young  
602 athletes in soccer. *Procedia social and behavioral sciences* 152, 824-829.
- 603 23. Clopper, C.G., and Pisoni, D.B. (2004). Effects of talker variability on perceptual learning of  
604 dialects. *Language and speech* 47, 207-239.
- 605 24. Van Merriënboer, J.J.G., and Kirschner, P.A. (2007). *Ten steps to complex learning* (Taylor &  
606 Francis).
- 607 25. Desimone, R., Schein, S.J., Moran, J., and Ungerleider, L.G. (1985). Contour, color and shape  
608 analysis beyond the striate cortex. *Vision research* 25, 441-452.
- 609 26. Sary, G., Vogels, R., and Orban, G.A. (1993). Cue-invariant shape selectivity of macaque inferior  
610 temporal neurons. *Science* 260, 995-997.
- 611 27. Adab, H.Z., and Vogels, R. (2016). Perturbation of posterior inferior temporal cortical activity  
612 impairs coarse orientation discrimination. *Cerebral cortex* 26, 3814-3827.
- 613 28. Fahle, M. (2004). Perceptual learning: a case for early selection. *Journal of vision* 4, 879-890.
- 614 29. Lu, Z.-L., and Doshier, B.A. (2022). Current directions in visual perceptual learning. *Nature*  
615 *Reviews Psychology* 1, 654-668.
- 616 30. Xiao, L.Q., Zhang, J.Y., Wang, R., Klein, S.A., Levi, D.M., and Yu, C. (2008). Complete transfer of  
617 perceptual learning across retinal locations enabled by double training. *Current biology* 18,  
618 1922-1926.
- 619 31. Zhang, J.Y., Zhang, G.L., Xiao, L.Q., Klein, S.A., Levi, D.M., and Yu, C. (2010). Rule-based learning  
620 explains visual perceptual learning and its specificity and transfer. *Journal of neuroscience* 30,  
621 12323-12328.
- 622 32. Harris, H., Glicksberg, M., and Sagi, D. (2012). Generalized perceptual learning in the absence  
623 of sensory adaptation. *Current biology* 22, 1813-1817.
- 624 33. Adab, H.Z., Popivanov, I.D., Vanduffel, W., and Vogels, R. (2014). Perceptual learning of simple  
625 stimuli modifies stimulus representations in posterior inferior temporal cortex. *Journal of*  
626 *cognitive neuroscience* 26, 2187-2200.
- 627 34. Deveau, J., and Seitz, A.R. (2014). Applying perceptual learning to achieve practical changes in  
628 vision. *Frontiers in psychology* 5, 1166.
- 629 35. Brainard, D.H. (1997). The Psychophysics Toolbox. *Spatial vision* 10, 433-436.
- 630 36. De Valois, R.L., and De Valois, K.K. (1990). *Spatial vision* (Oxford University Press).
- 631 37. Guan, S.C., Ju, N.S., Tao, L., Tang, S.M., and Yu, C. (2021). Functional organization of spatial  
632 frequency tuning in macaque V1 revealed with two-photon calcium imaging. *Progress in*  
633 *neurobiology* 205, 102120.

- 634 38. Higgins, J.J., and Tashtoush, S. (1994). An aligned rank transform test for interaction. *Nonlinear*  
635 *World 1*, 201-211.
- 636 39. Wobbrock, J.O., Findlater, L., Gergle, D., and Higgins, J.J. (2011). The Aligned Rank Transform  
637 for Nonparametric Factorial Analyses Using Only Anova Procedures. *Proceedings of the SIGCHI*  
638 *Conference on Human Factors in Computing Systems*, 143–146.
- 639 40. Rousseeuw, P.J., and Croux, C. (1993). Alternatives to the median absolute deviation. *Journal*  
640 *of the American Statistical Association 88*, 1273-1283.
- 641 41. Prins, N., and Kingdom, F.A.A. (2018). Applying the Model-Comparison Approach to Test  
642 Specific Research Hypotheses in Psychophysical Research Using the Palamedes Toolbox.  
643 *Frontiers in psychology 9*, 1250.
- 644 42. Freiwald, W.A., and Tsao, D.Y. (2010). Functional compartmentalization and viewpoint  
645 generalization within the macaque face-processing system. *Science 330*, 845-851.
- 646 43. Farzmaḥdi, A., Rajaei, K., Ghodrati, M., Ebrahimpour, R., and Khaligh-Razavi, S.M. (2016). A  
647 specialized face-processing model inspired by the organization of monkey face patches  
648 explains several face-specific phenomena observed in humans. *Scientific reports 6*, 25025.
